1  
2  
3  
4  
5  
6  
7  
8  
9  
10  
11  
12  
13  
14  
15  
16  
17  
18  
19  
20  
21  
22  
23  
24  
25

Hepatitis B mother-to-child transmission in the Eastern Region of Ghana: A cross-sectional pilot study

Thomas Hambridge<sup>1</sup>, Yvonne Nartey<sup>1,2</sup>, Amoako Duah<sup>3</sup>, Amelie Plymoth<sup>1</sup>

<sup>1</sup>Department of Medical Epidemiology and Biostatistics (MEB), Karolinska Institutet, Stockholm, Stockholm County, Sweden

<sup>2</sup>Department of Medicine and Therapeutics, Cape Coast Teaching Hospital, Cape Coast, Central Region, Ghana

<sup>3</sup>Department of Medicine, St. Dominic's Hospital, Akwatia, Eastern Region, Ghana

\* Corresponding author

E-mail: [thomas.hambridge@stud.ki.se](mailto:thomas.hambridge@stud.ki.se)

## 26 **Abstract**

## 27 **Background**

28 Hepatitis B is a major health concern in Ghana, where prevalence of the virus remains high and  
29 most chronic patients are infected during childhood or at birth. There are several factors which  
30 can influence transmission risk from an infected mother to her infant, such as the presence of  
31 viral markers, the viral load and the use of prophylactic interventions. It is therefore important  
32 to determine the prevalence and main factors associated with mother-to-child transmission of  
33 hepatitis B in the context of Ghana.

## 34 **Materials and methods**

35 In this cross-sectional pilot study, hepatitis B testing was performed on infants born to infected  
36 mothers at a single site in the Eastern Region of Ghana. Test results were matched to a  
37 questionnaire which consisted of variables related to pregnancy and birth conditions. This was  
38 primarily a descriptive study to determine the prevalence of hepatitis B mother-to-child  
39 transmission as well as the preventive interventions and diagnostic methods used. The study  
40 variables were also analysed independently using Fisher's exact test, while mother's age at the  
41 time of delivery was assessed using univariate logistic regression.

## 42 **Results**

43 A total of 51 cases were included in the study and three (5.9%) of the infants tested positive.  
44 No significant association was observed between mother's age and mother-to-child  
45 transmission (OR: 1.077, 95% CI: 0.828 – 1.403, p=0.58). A majority of infants received the  
46 standard hepatitis B vaccination schedule (96.1%) while two-thirds received the birth dose.  
47 There was no significant association observed between the clinical interventions reported in  
48 the study and mother-to-child transmission. Testing for viral markers and the use of antiviral  
49 therapy during pregnancy were absent in the population and could not be reliably assessed.

## 50 **Conclusion**

51 There was a low prevalence of HBV mother-to-child transmission observed despite a clear  
52 absence of viral marker and viral load testing. It is recommended that viral profile analysis is  
53 performed for hepatitis B positive pregnancies to identify high risk cases.

## 54 **Introduction**

55 Hepatitis B virus (HBV) remains a global health concern, with an estimated 2 billion people  
56 serologically positive worldwide [1]. According to a recent report from the World Health  
57 Organization (WHO), approximately 257 million individuals were chronically ill with the  
58 disease in 2015 [2]. Moreover, global mortality from hepatitis B is increasing, accounting for  
59 up to 1.2 million deaths per year [3]. In high prevalence areas, HBV infection is typically  
60 acquired during childhood or through perinatal transmission [4]. Mother-to-child transmission  
61 (MTCT) can refer to three separate modes of transmission: during pregnancy (intrauterine  
62 infection); during delivery; or postpartum horizontal transmission through breastfeeding or  
63 daily contact [5]. It is estimated that 90% of infected newborns will go on to develop chronic  
64 hepatitis B (CHB) and are at much higher risk of developing liver disease, including cirrhosis  
65 and hepatocellular carcinoma during their adulthood [6–9]. Thus, taking measures to stop  
66 MTCT is essential for reducing the burden of CHB.

67 In Ghana, chronic infection with HBV is considered highly endemic. In a recent systematic  
68 review of 30 studies across all 10 regions, Ofori-Asenso & Agyeman found that hepatitis B  
69 surface antigen (HBsAg) seropositivity was 12.3% [10]. These figures are more or less in line  
70 with a systematic review conducted by Schweitzer et al. which estimated that the prevalence  
71 of chronic HBV in Ghana was 12.9% [11]. Ghana introduced hepatitis B vaccination (DPT-  
72 Hib-HBV pentavalent vaccine) as part of the Expanded Programme on Immunization (EPI) in  
73 2002, recommending administration of the vaccine at 6, 10 and 14 weeks. Additionally, WHO  
74 recommends administration of the HBV vaccine within 24 hours of birth. However, birth dose  
75 coverage remains low at 39% globally and Ghana is one of several countries yet to adopt this  
76 policy at a national level [12]. Moreover, The WHO Western Pacific Region highlighted in a  
77 recent report that post-vaccination serologic testing (PVST) for HBsAg and antibodies could  
78 be used to help evaluate infant seroprotection following immunization [13]. In addition to the  
79 birth dose vaccine, it is crucial to identify infants who are at higher risk of perinatal  
80 transmission to administer hepatitis B immune globulin (HBIG), which has previously been  
81 shown to be an effective form of post-exposure prophylaxis [14,15].

82 Hepatitis B e antigen (HBeAg) status and elevated viral load during pregnancy are established  
83 risk factors for perinatal transmission [16–18]. The rates of HBeAg seroconversion in  
84 chronically infected individuals, i.e. the clearance and development of antibodies against the  
85 antigen, increase with age [9]. This means that mother's age during gestation could also be an

86 important risk factor for transmission. Although there has been extensive research into the  
87 factors influencing HBV mother-to-child transmission, there has been limited focus on the  
88 context of West Africa and specifically Ghana. This is particularly relevant given the high  
89 prevalence of HBV genotype E in the region, a genetic variant of the virus which requires  
90 further investigation. Compared to other genetic variants of HBV, transmission of genotype E  
91 appears to be predominantly horizontal in endemic areas [19–21]. Moreover, HBeAg  
92 seroconversion likely occurs before child-bearing age in Ghana where genotype E is  
93 predominant and may result in lower rates of MTCT compared to other countries.

94 The main objective of this cross-sectional pilot study was to determine the prevalence of HBV  
95 mother-to-child transmission at a hospital in the Eastern Region of Ghana and to assess the  
96 clinical interventions employed. We also sought to identify the main factors associated with  
97 HBV mother-to-child transmission in this setting and to use these preliminary findings to  
98 develop a larger prospective cohort study to be conducted at multiple sites throughout Ghana.

## 99 **Materials and methods**

### 100 **Study area**

101 The study was conducted at St Dominic’s Hospital, Akwatia in the Eastern Region of Ghana.  
102 There are roughly 2200 babies born at St Dominic’s hospital each year and this site was selected  
103 based on the availability of accessible maternal health records and contact details for the  
104 mothers. The hospital is funded by donor and government contributions and does not have any  
105 specific protocols for handling cases of HBsAg positive pregnancies. They follow the national  
106 policy regarding birth dose vaccine and HBIG, both of which must be paid for out-of-pocket.

### 107 **Study population and subject selection**

108 Convenience sampling of maternal health records was used to retrospectively identify mothers  
109 who were HBsAg positive during pregnancy within the specified study period, with their child  
110 aged between 6-24 months at the time of recruitment. At St. Dominic’s Hospital, HBsAg  
111 positive cases are recorded within the first days of visiting the antenatal care clinic and up until  
112 delivery. Using these records, a list was compiled which consisted of eligible mothers who  
113 gave birth within the specified time period. Cases were excluded where infants were outside of  
114 the study age range at the time of testing, as well as mothers who declined to provide consent.

## 115 **Sample analysis**

116 Tests were performed using InTec HBsAg Rapid Test Strips of whole blood. According to the  
117 manufacturer, test strips have a sensitivity of 99.4% and specificity of 99.8%. Positive test  
118 results in infants were confirmed by laboratory analysis. Results from prospective HBsAg  
119 testing were matched to responses from a questionnaire completed by the mother, which  
120 included questions relating to the birth context and interventions.

121 The variables included in the questionnaire were selected based on evidence from previous  
122 studies in different settings. These included mother's age at the time of delivery, the birth  
123 location, the birth type, the infant's vaccination status, HBIG administration, mother's HBeAg  
124 status, viral load measurements, PVST and whether antiviral treatment was administered  
125 during pregnancy. The questionnaire responses were a combination of recall by the mothers  
126 and information retrieved from government issued maternal and child health records.

## 127 **Data analyses**

128 Questionnaire response and hepatitis B test data for all cases (n=51) was entered into Microsoft  
129 Excel 2007 and imported into Statistical Package for Social Sciences (SPSS) version 25 for  
130 analysis. Descriptive analysis was performed for all cases to assess the questionnaire response  
131 rates. This analysis was also intended to measure the scope of viral marker testing and  
132 interventions in HBsAg positive pregnancies and evaluate how cases are managed in the clinic.  
133 Categorical data was expressed here as a number and percentage.

134 Each of the responses collected from the questionnaire (aside from mother's age and viral load)  
135 were categorical variables and analysed independently as unpaired data. The outcome used in  
136 the analysis of questionnaire responses was whether the child was HBsAg positive, i.e. whether  
137 mother-to-child transmission had occurred. The outcome was binary categorical. The data was  
138 cross-tabulated and analysed using Fisher's exact test for independence. All p-values for this  
139 test were two-tailed with  $p < 0.05$  considered significant.

140 To investigate the effect of mother's age at time of delivery on transmission risk, a univariate  
141 (unadjusted) logistic regression analysis was performed to determine whether there was an  
142 increased risk associated with incremental change in mother's age. Odds ratio (OR) with 95%  
143 confidence intervals (CI) are presented. The p-values for the univariate logistic regression were  
144 two-tailed with  $p < 0.05$  considered significant. This pilot study was not sufficiently powered to  
145 perform multivariate logistic regression to adjust for covariates.

## 146 **Ethical considerations**

147 The study was approved by the institutional ethical review board at St Dominic's Hospital and  
148 local permission was obtained prior to recruitment. The details and reasons for the study were  
149 clearly explained in a language that was understood by participants. Information was provided  
150 including risks, benefits and any possible complications. Consenting mothers were asked to  
151 visit the clinic with their child for HBsAg testing and to complete the study questionnaire.

## 152 **Results**

### 153 **General characteristics**

154 A total of 51 cases were included in the study. Mother's age in the sample population ranged  
155 from 23 to 40 years. The average age was 31.2 years and only two mothers recruited into the  
156 study were under the age of 25. All deliveries took place within a hospital setting with no home  
157 births observed. The percentage of caesarean sections was 37.3% and a majority of births were  
158 vaginal deliveries (62.7%) (Table 1)

159 Table 1. General characteristics of the mothers included in the study and the birth type, n=51

| <b>Mother's age</b> |            | <b>Delivery</b> |                     |
|---------------------|------------|-----------------|---------------------|
| Parameter           | Value (SD) | Birth type      | Number of cases (%) |
| Mean age            | 31.2 (4.6) | Home            | 0 (0)               |
| Median age          | 31.5       | Hospital        | 51 (100)            |
| Minimum             | 23         | Vaginal         | 32 (62.7)           |
| Maximum             | 40         | Caesarean       | 19 (37.3)           |

160

### 161 **Clinical interventions**

162 There was a high vaccination rate observed (96.1%), with only two of the infants receiving no  
163 HBV vaccine at all. Two-thirds of infants received the WHO recommended birth dose  
164 administered within the first 24 hours. Moreover, a majority of infants received the EPI three  
165 dose vaccine schedule at 6, 10 and 14 weeks of age in addition to the birth dose (59.2%).  
166 Despite the high vaccination rates, none of the infants underwent PVST to evaluate  
167 seroprotection status. More than half of the infants (60%) received single dose HBeAg at birth  
168 to provide further protection. Only one mother received antiviral therapy during pregnancy and  
169 her HBV DNA was measured, which was less than 20 IU/ml. There were no HBeAg tests  
170 performed during pregnancy. However, HBeAg was tested on three occasions post-delivery,  
171 with all three tests returning positive results (Tables 2 and 3).

172 Table 2. Proportion of study participants receiving vaccination and prophylactic interventions

| <b>Clinical interventions</b>        |                            |
|--------------------------------------|----------------------------|
| <b>Intervention</b>                  | <b>Number of cases (%)</b> |
| <b>Vaccinated</b>                    |                            |
| Yes                                  | 49 (96.1)                  |
| No                                   | 2 (3.9)                    |
| <b>Vaccine birth dose*</b>           |                            |
| Yes                                  | 32 (66.7)                  |
| No                                   | 16 (33.3)                  |
| <b>Vaccine type</b>                  |                            |
| Monovalent                           | 3 (6.1)                    |
| Pentavalent                          | 17 (34.7)                  |
| Both                                 | 29 (59.2)                  |
| <b>PVST</b>                          |                            |
| Yes                                  | 0 (0)                      |
| No                                   | 49 (100)                   |
| <b>HBIG administered<sup>†</sup></b> |                            |
| Yes                                  | 30 (60.0)                  |
| No                                   | 20 (40.0)                  |
| <b>Antiviral therapy</b>             |                            |
| Yes                                  | 1 (2.0)                    |
| No                                   | 50 (98.0)                  |

173 \*one case uncertain whether vaccination was administered within the first 24hrs

174 <sup>†</sup>one case uncertain whether HBIG was administered

175

176 Table 3. Hepatitis B viral marker testing rates and results

| <b>Viral marker testing</b>      |                            |
|----------------------------------|----------------------------|
| <b>Testing</b>                   | <b>Number of Cases (%)</b> |
| <b>HBeAg tested<sup>*†</sup></b> |                            |
| Yes                              | 3 (6.0)                    |
| No                               | 47 (94.0)                  |
| <b>HBeAg result*</b>             |                            |
| Positive                         | 3 (100)                    |
| Negative                         | 0 (0)                      |
| <b>HBV DNA tested</b>            |                            |
| Yes                              | 1 (2.0)                    |
| No                               | 50 (98.0)                  |
| <b>HBV DNA result</b>            |                            |
| <20 IU/ml                        | 1 (100)                    |

177 \*HBeAg testing performed after delivery

178 <sup>†</sup>one case uncertain whether HBeAg testing was performed

## 179 **Factors associated with HBV mother-to-child transmission**

180 To investigate mother's age at the time of delivery as a potential factor for transmission, a  
181 univariate logistic regression was performed with no covariates included in the model. This  
182 showed no significant association (OR: 1.077, 95% CI: 0.828 – 1.403, p=0.58). The remaining  
183 binary study variables were analysed using Fisher's exact test of independence. Prevention of  
184 MTCT through administration of HBIG at birth was not significant (p=0.06), despite no  
185 transmission observed in any of the 30 cases that received the prophylaxis. None of the other  
186 study variables, including birth type, any vaccination, birth dose vaccine or antiviral therapy  
187 during pregnancy demonstrated significance using this statistical method. Data collected from  
188 the study questionnaire was insufficient to test for an association between HBeAg status or  
189 DNA viral load and risk of transmission.

190 Table 4. Mother's age at time of delivery in relation to HBV mother-to-child transmission

| <b>Mother's age</b> |                 |         |
|---------------------|-----------------|---------|
| Odds Ratio          | 95% CI          | p-value |
| 1.077               | (0.828 – 1.403) | 0.58    |

191

192 Table 5. Factors related to HBV mother-to-child transmission

| <b>Factors associated with mother-to-child transmission</b> |         |
|-------------------------------------------------------------|---------|
| Variable                                                    | p-value |
| Birth type                                                  | 0.29    |
| Vaccinated                                                  | 1.00    |
| Vaccine birth dose                                          | 0.25    |
| HBIG administered                                           | 0.06    |
| Antiviral therapy                                           | 1.00    |

193

## 194 **Discussion**

195 This formative study aimed to determine the prevalence of HBV mother-to-child transmission  
196 at a single site in the Eastern Region of Ghana as a pre-trial for a larger study. The main factors  
197 associated with MTCT were investigated quantitatively, while the responses from the  
198 questionnaires were used to evaluate how HBsAg positive pregnancies were managed in the  
199 clinic. Given that the estimated national prevalence of individuals with CHB is approximately  
200 12.3% in Ghana [10], the finding that only three of the 51 infants were HBsAg positive in this  
201 study was somewhat lower than anticipated. This is an important observation and appears to  
202 align more closely with the 8.3% HBV maternofetal transmission rate in chronic carriers



203 observed by Candotti et al. in Kumasi [22] and the 8.7% seroprevalence reported by Amidu et  
204 al. in the nearby Ashanti region [23]. In most cases, when an adult is exposed to HBV, the virus  
205 will be cleared completely with no long-term manifestations. Conversely, a majority of those  
206 exposed to the virus during childhood when the immune system is immature will go on to  
207 develop lifelong infection [17]. If the prevalence of HBV mother-to-child transmission is in  
208 fact lower than expected in Ghana, this may support the argument that early horizontal  
209 transmission through direct contact is a major source of newly acquired chronic HBV infections  
210 in West Africa [22,24,25]. It should be highlighted here that we used a maximum inclusion age  
211 limit of 24 months to minimise false negatives while maintaining the assumption that any  
212 positive tests observed were the result of MTCT rather than early horizontal transmission. This  
213 assumption may therefore be a limitation of the study.

214 Although this pilot study was unable to demonstrate significant protection against HBV  
215 mother-to-child transmission with HBIG ( $p=0.06$ ), this intervention has been previously shown  
216 to be an effective form of prevention [14,15]. The issue with the single-dose HBIG is that it is  
217 an expensive form of post-exposure prophylaxis and is not covered by the National Health  
218 Insurance Scheme (NHIS) in Ghana. There was also no significant association observed  
219 using univariate logistic regression of mother's age. There is rationale to explore this further  
220 with a larger sample size, as younger women are more likely to be in the HBeAg positive and  
221 high viral load phase known as 'immune tolerance' [1]. It has been proposed that HBeAg  
222 seroconversion of HBV genotype E occurs at a much younger age than other genotypes,  
223 although this may still be an important factor to consider in younger women of childbearing  
224 age who have not yet seroconverted [26].

225 The vaccination rates observed at St. Dominic's Hospital were encouraging, at 96.1% in total.  
226 A further 66.7% of all infants received the WHO recommended birth dose and only two  
227 received no HBV vaccine at all. The study was unable to demonstrate a significant association  
228 between vaccination and MTCT. Although speculative given the limited sample size, there is  
229 reason to hypothesise that sustained seroprotection may play a role in transmission risk,  
230 particularly with a potential lack of cross protection towards the endemic HBV genotype E  
231 [17,27]. This is currently an area of research interest in Ghana as vaccination uptake continues  
232 to increase and should be further investigated in the follow-up phase. It could also put a greater  
233 importance on PVST to ensure non-responders receive full vaccine protection. None of the  
234 infants in this study underwent PVST to evaluate seroprotection status.

235 One of the most important observations in this study was the absence of HBeAg and viral load  
236 testing. HBV viral profile testing can be performed locally to determine HBeAg status of  
237 infected mothers and may be used as a surrogate marker for high viral load. It has been  
238 consistently demonstrated in previous studies conducted in different settings that a positive  
239 HBeAg status and high viral load during pregnancy are strongly associated with elevated risk  
240 of MTCT [16–18]. In fact, of the three cases that performed HBeAg testing after delivery, each  
241 was positive for this marker and MTCT was observed in two of the three cases. Although these  
242 factors could not be reliably assessed here, the fact that no HBeAg test was performed and only  
243 one viral load was measured prior to delivery is a finding in itself. Moreover, they could  
244 represent key stages in the pregnancy and perinatal period which require further intervention  
245 to reduce the occurrence of MTCT in Ghana.

## 246 **Conclusion**

247 There was a low prevalence of HBV mother-to-child transmission observed despite a clear  
248 absence of viral marker testing and subsequent intervention. Nevertheless, it is strongly  
249 recommended that positive HBsAg tests in Ghana are followed up with a viral profile analysis  
250 as an effective method of identifying high risk cases.

## 251 **Acknowledgements**

252 We wish to express a special thanks to the staff at St. Dominic’s Hospital for their warm  
253 hospitality while conducting our research there and to all of the families who participated.  
254 We are also grateful to Professor Lewis Roberts at the Mayo Clinic and to the wider research  
255 team for all of their support and contributions.

## 256 **Author’s contributions**

257 Study design: TH YN AD AP. Enrolled/recruited participants: AD. Performed the study: TH  
258 AD. Analysed the data: TH YN. Contributed materials and analysis support: AD AP. Wrote  
259 the paper: TH YN AD AP.

## 260 **References**

- 261 1. McMahon BJ. Natural History of Chronic Hepatitis B. *Clin Liver Dis.* 2010;14: 381–  
262 396.
- 263 2. World Health Organization. *Global Hepatitis Report.* 2017.

- 264 3. Spearman CW, Afihene M, Ally R, Apica B, Awuku Y, Cunha L, et al. Hepatitis B in  
265 sub-Saharan Africa: Strategies to Achieve the 2030 Elimination Targets. *Lancet*  
266 *Gastroenterol Hepatol.* 2017;2: 900–909.
- 267 4. Franco E, Bagnato B, Marino MG, Meleleo C, Serino L, Zaratti L. Hepatitis B:  
268 Epidemiology and prevention in developing countries. *World J Hepatol.* 2012;4: 74.
- 269 5. Ma L, Alla NR, Li X, Mynbaev OA, Shi Z. Mother-to-child Transmission of HBV:  
270 Review of Current Clinical Management and Prevention Strategies. 2014;24: 396–406.
- 271 6. Keeble S, Quested J, Barker D, Varadarajan A, Shankar AG. Immunization of Babies  
272 Born to HBsAg Positive Mothers: An Audit on the Delivery and Completeness of  
273 Follow up in Norfolk and Suffolk, United Kingdom. *Hum Vaccines Immunother.*  
274 2015;11: 1153–56.
- 275 7. Yang JD, Gyedu A, Afihene MY, Duduyemi BM, Micah E, Kingham TP, et al.  
276 Hepatocellular Carcinoma Occurs at an Earlier Age in Africans, Particularly in  
277 Association With Chronic Hepatitis B. *Am J Gastroenterol.* 2015;110: 1629.
- 278 8. Kao J-H. Hepatitis B Vaccination and Prevention of Hepatocellular Carcinoma. *Best*  
279 *Pract Res Clin Gastroenterol.* 2015;29: 907–17.
- 280 9. Chang M-H. Hepatitis B virus infection. *Semin fetal neonatal Med.* Elsevier; 2007;12:  
281 160–167.
- 282 10. Ofori-Asenso R, Agyeman AA. Hepatitis B in Ghana: A Systematic Review and Meta-  
283 analysis of Prevalence Studies (1995-2015). *BMC Infect Dis.* 2016;16: 130.
- 284 11. Schweitzer, A., Horn, J., Mikolajczyk, R.T., Krause, G. and Ott JJ. Estimations of  
285 worldwide prevalence of chronic hepatitis B virus infection: a systematic review of  
286 data published between 1965 and 2013. *Lancet.* Elsevier; 2015;386: 1546–1555.
- 287 12. Awuku YA, Yeboah-Afihene M. Hepatitis B At-Birth Dose Vaccine: An Urgent Call  
288 for Implementation in Ghana. *Vaccines.* 2018;6: 15. doi:10.3390/vaccines6010015
- 289 13. World Health Organization. Hepatitis B control through immunization: A reference  
290 guide. 2014.
- 291 14. Beasley RP, Lee GC-Y, Roan C-H, Hwang L-Y, Lan C-C, Huang F-Y, et al.  
292 Prevention of Perinatally Transmitted Hepatitis B Virus Infections with Hepatitis B

- 293 Immune Globulin and Hepatitis B Vaccine. 1983;332: 1099–102.
- 294 15. Mele A, Tancredi F, Romanò L, Giuseppone A, Colucci M, Sangiuolo A, et al.  
295 Effectiveness of Hepatitis B Vaccination in Babies Born to Hepatitis B Surface  
296 Antigen-Positive Mothers in Italy. *J Infect Dis.* 2001;184: 905–8.
- 297 16. Beasley RP, Trepo C, Stevens CE, Szmuness W, Beasley RP. The e Antigen and  
298 Vertical Transmission of Hepatitis B Surface Antigen. *Am J Epidemiol Hyg Public*  
299 *Heal.* 1977;105.
- 300 17. Pan CQ, Ping Duan Z-, Bhamidimarri KR, Zou H- Bin, Liang X- F, Li J, et al. An  
301 Algorithm for Risk Assessment and Intervention of Mother to Child Transmission of  
302 Hepatitis B Virus. *Clin Gastroenterol Hepatol.* 2012;10: 452–459.
- 303 18. Zhang Z, Li A, Xiao X. Risk factors for intrauterine infection with hepatitis B virus.  
304 *Int J Gynecol Obstet.* Wiley Online Library; 2014;125: 158–161.
- 305 19. Pujol FH, Navas MC, Hainaut P, Chemin I. Worldwide Genetic Diversity of HBV  
306 Genotypes and Risk of Hepatocellular Carcinoma. *Cancer Lett.* 2009;286: 80–8.
- 307 20. Liu C-J, Kao J-H. Global Perspective on the Natural History of Chronic Hepatitis B:  
308 Role of Hepatitis B Virus Genotypes A to J. *Semin Liver Dis.* 2013;33: 97–102.
- 309 21. Sunbul M. Hepatitis B Virus Genotypes: Global Distribution and Clinical Importance.  
310 *World J Gastroenterol.* 2014;20: 5427.
- 311 22. Candotti D, Danso K, Allain J-P. Maternofetal Transmission of Hepatitis B Virus  
312 Genotype E in Ghana, West Africa. *J Gen Virol.* 2007;88: 2686–95.
- 313 23. Amidu N, Alhassan A, Obirikorang C, Feglo P, Majeed SF, Timmy-Donkoh E, et al.  
314 Sero-prevalence of hepatitis B surface (HBsAg) antigen in three densely populated  
315 communities in Kumasi, Ghana. *J Med Biomed Sci. School of Medicine and Health*  
316 *Sciences, University for Development Studies;* 2012;1.
- 317 24. Martinson FEA, Weigle KA, Royce RA, Weber DJ, Suchindran CM, Lemon SM. Risk  
318 Factors for Horizontal Transmission of Hepatitis B Virus in a Rural District in Ghana.  
319 *Am J Epidemiol.* 1998;147.
- 320 25. Dumpis U, Holmes EC, Mendy M, Hill A, Thursz M, Hall A, et al. Transmission of  
321 hepatitis B virus infection in Gambian families revealed by phylogenetic analysis. *J*

- 322 Hepatol. Elsevier; 2001;35: 99–104.
- 323 26. Andernach IE, Hü Bschen JM, Muller CP. Hepatitis B Virus: The Genotype E Puzzle.  
324 Rev Med Virol. 2009;19: 231–240.
- 325 27. Tacke F, Amini-Bavil-Olyae S, Heim A, Luedde T, Manns MP, Trautwein C. Acute  
326 Hepatitis B Virus Infection by Genotype F Despite Successful Vaccination in an  
327 Immune-competent German Patient. J Clin Virol. 2007;38: 353–7.
- 328
